# Supplementary material for: A Comparative Study on Changes in Protein, Lipid and Meat-Quality Attributes of Camel Meat, Beef and Sheep Meat (Mutton) during Refrigerated Storage
Source: MDPI journal article supplement (doi:10.3390/ani13050904), 2023-03-02
Supplement: s1 [file animals-2118697-supplementary.pdf › animals-2118697-supplementary.pdf]

**Table S1. Mineral composition of camel meat, beef and lamb meat during 9 days of refrigerated storage**

| <b>Sample/<br/>Mineral<br/>content (ppm)</b> | <b>Ca</b> | <b>K</b> | <b>Mg</b> | <b>Na</b> | <b>S</b> | <b>P</b> | <b>Cu</b> | <b>Co</b> | <b>Fe</b> | <b>Mn</b> | <b>Zn</b> |
|----------------------------------------------|-----------|----------|-----------|-----------|----------|----------|-----------|-----------|-----------|-----------|-----------|
| Camel Meat<br>(CM)                           | 484.2     | 2601.4   | 202.9     | 453.1     | 1785.4   | 1843.7   | 0.593     | <0.003    | 30.4      | 0.043     | 56.7      |
| Beef (BF)                                    | 78.4      | 2763.3   | 248.3     | 420.3     | 2019.6   | 1907.2   | 0.724     | <0.003    | 15.1      | 0.101     | 30.5      |
| Mutton (MT)                                  | 57.2      | 2601.2   | 235.1     | 617.7     | 2016.6   | 1890.1   | 1.067     | <0.003    | 12.4      | 0.078     | 29.3      |
